1 **The effect of molnupiravir and nirmatrelvir on SARS-CoV-2**  
2 **genome diversity in infected and immune suppressed mice.**

3

4 Rebekah Penrice-Randal<sup>1\*†</sup>, Eleanor G. Bentley<sup>1\*</sup>, Parul Sharma<sup>1</sup>, Adam Kirby<sup>1</sup>, I'ah  
5 Donovan-Banfield<sup>1,2</sup>, Anja Kipar<sup>1,3</sup>, Daniele F. Mega<sup>1</sup> Chloe Bramwell<sup>1,4</sup>, Joanne  
6 Sharp<sup>4</sup>, Andrew Owen<sup>4,5</sup>, Julian A. Hiscox<sup>1,2,6</sup> and James P. Stewart<sup>1,5</sup>.

7

8 <sup>1</sup>Department of Infection Biology and Microbiomes, University of Liverpool, Liverpool,  
9 UK.

10 <sup>2</sup>NIHR Health Protection Research Unit in Emerging and Zoonotic Infections,  
11 Liverpool, UK.

12 <sup>3</sup>Laboratory for Animal Model Pathology, Institute of Veterinary Pathology, Vetsuisse  
13 Faculty, University of Zurich, Switzerland.

14 <sup>4</sup>Department of Pharmacology and Therapeutics, University of Liverpool, UK.

15 <sup>5</sup>Centre of Excellence in Long-acting Therapeutics (CELT), University of Liverpool,  
16 UK.

17 <sup>6</sup>A\*STAR Infectious Diseases Laboratories (A\*STAR ID Labs), Agency for Science,  
18 Technology and Research (A\*STAR), Singapore.

19

20 \*These authors contributed equally.

21 † Corresponding author: [rebee@liverpool.ac.uk](mailto:rebee@liverpool.ac.uk)

22

23 **Running title:** Antiviral and SARS-CoV-2 genome diversity

## 24 **Synopsis**

25 **Objectives.** Immunocompromised individuals are susceptible to severe COVID-19  
26 and potentially contribute to the emergence of variants with altered pathogenicity due  
27 to persistent infection. This study investigated the impact of immunosuppression on  
28 SARS-CoV-2 infection in k18-hACE2 mice and the effectiveness of antiviral  
29 treatments in this context.

30 **Methods** Mice were immunosuppressed using cyclophosphamide and infected with a  
31 B lineage of SARS-CoV-2. Molnupiravir and nirmatrelvir, alone and in combination,  
32 were administered and viral load and viral sequence diversity was assessed.

33 **Results** Treatment of infected but immune compromised mice with both compounds  
34 either singly or in combination resulted in decreased viral loads and pathological  
35 changes compared to untreated animals. Treatment also abrogated infection of  
36 neuronal tissue. However, no consistent changes in the viral consensus sequence  
37 were observed, except for the emergence of the S:H655Y mutation. Molnupiravir, but  
38 not nirmatrelvir or immunosuppression alone, increased the transition/transversion  
39 (Ts/Tv) ratio, representative of A>G and C>U mutations and this increase was not  
40 altered by the co-administration of nirmatrelvir with molnupiravir.

41 Notably, immunosuppression itself did not appear to promote the emergence of  
42 mutational characteristic of variants of concern (VOCs).

43 **Conclusions** Further investigations are warranted to fully understand the role of  
44 immunocompromised individuals in VOC development and to inform optimised public  
45 health strategies. It is more likely that immunodeficiency promotes viral persistence  
46 but does not necessarily lead to substantial consensus-level changes in the absence  
47 of antiviral selection pressure. Consistent with mechanisms of action, molnupiravir  
48 showed a stronger mutagenic effect than nirmatrelvir in this model.

49

## 50 **Keywords**

51 SARS-CoV-2, COVID-19, immunocompromised, intra-host evolution, Molnupiravir,  
52 Nirmatrelvir, Paxlovid.

## 53 Introduction

54

55 Unsurprisingly, since the start of the SARS-CoV-2 pandemic and the first deposited  
56 genome sequences, and like other coronaviruses, SARS-CoV-2 has diverged through  
57 single nucleotide polymorphism, and homologous and heterologous recombination  
58 applications resulting in insertions and deletions <sup>1,2</sup>. Over the course of the pandemic  
59 changes that have dominated have resulted in increased transmissibility such as the  
60 P323L/D614G changes in early 2020 <sup>3-5</sup>, immune-evasion <sup>6</sup> and altered pathogenicity  
61 <sup>7</sup>.

62

63 Founder effects, population bottlenecks, selection pressures and behaviour have  
64 contributed to the diversification of the SARS-CoV-2 genome but also to the apparent  
65 waves of different variants. Several Variants of Concern (VoCs) have arisen that have  
66 a transmission advantage and/or potential immune evasion. Some reports have  
67 suggested that such variants may have arisen in hosts with compromised immunity  
68 and/or persistent infections, where infection leads to the generation of more diverse  
69 variants through longer viral evolution within an individual <sup>8</sup>. This includes a changing  
70 landscape of dominant viral genome sequence and minor genomic variants in immune  
71 compromised individuals e.g. in a patient with cancer <sup>9</sup>. Changes within the individual  
72 mapped to several different regions on the SARS-CoV-2 genome including the spike  
73 glycoprotein and orf8.

74

75 Complicating the picture of potential rapid and dramatic genomic change in immune  
76 compromised hosts is that similar changes can be observed in immune competent  
77 patients. This can be either as part of the dominant genomic sequence <sup>10</sup> or minor  
78 variant genomes <sup>1</sup>. Indeed, genomic variants with deletions can be identified in the  
79 minor genomic variant population of Middle East respiratory syndrome coronavirus  
80 (MERS-CoV) from patients <sup>11</sup> and as part of the dominant genomic sequence in  
81 camels <sup>12,13</sup>.

82

83 Parallels with other animal coronaviruses can be found where persistent infections are  
84 established, and this might be associated in pathogenicity; an example are feline  
85 coronavirus (FCoV) infections and feline infectious peritonitis (FIP) <sup>14-17</sup>. Thus, one

86 concern with long term persistence of SARS-CoV-2 in immune compromised patients  
87 is that new transmissible variants could emerge <sup>8</sup>.

88

89 Three small molecule direct acting anti-virals (DAAs) have received early use  
90 authorisation for the treatment of COVID-19: remdesivir, molnupiravir (both nucleoside  
91 analogues which target viral nucleic acid synthesis) and nirmatrelvir (which targets the  
92 main viral protease). Unlike remdesivir, molnupiravir and nirmatrelvir are orally  
93 administered and thus more readily deployed for treatment in the community.  
94 Nirmatrelvir is packaged with ritonavir (as Paxlovid), this later molecule acting as a  
95 pharmacokinetic boosting agent to inhibit P450 (CYP) 3A4. However, adequate  
96 nirmatrelvir plasma concentrations can be achieved in mice without the need for  
97 ritonavir boosting. In cell culture single or combination treatment can result in  
98 decreased viral replication <sup>18, 19</sup> and a natural extension is that such anti-virals may be  
99 deployed as combination therapy to reduce the emergence of resistant genotypes <sup>20</sup>.  
100 Resistant genotypes/phenotypes have been identified in vitro for remdesivir <sup>21</sup>.  
101 Molnupiravir has previously been shown to enhance viral transition/transversion  
102 mutations in a phase II clinical trial <sup>22</sup> and a molnupiravir associated signature has  
103 been identified in circulating SARS-CoV-2 lineages since the introduction of  
104 molnupiravir in 2022 <sup>23</sup>.

105

106 Immunocompromised patients with a SARS-CoV-2 infection are treated as a priority  
107 with anti-virals, including those compounds that generically target virus replication by  
108 causing hyper-mutation or specifically preventing the function of a viral protein critical  
109 to the life cycle of the virus. Such anti-virals may be deployed as combination therapy  
110 to reduce the emergence of resistant genotypes <sup>20</sup> and may be particularly relevant  
111 for patients with compromised immunity <sup>24</sup>. However, in the latter patients, anti-virals  
112 may decrease viral loads but enhance genomic plasticity. To investigate this, the  
113 genomic variation of SARS-CoV-2 was evaluated in an immune compromised host, in  
114 the absence and presence of medical countermeasures. We have developed animal  
115 models of COVID-19 to be able to assess pathogenicity of new variants and develop  
116 interventions <sup>25-27</sup>. An immune suppressed K18-hACE2 transgenic mouse model was  
117 used to simulate patients with severe COVID-19 <sup>28, 29</sup>. Two anti-virals, molnupiravir  
118 and nirmatrelvir, were evaluated either singly or in combination.

## 119 **Methods**

120

### 121 **Animal infection and treatment**

122 A UK variant of SARS-CoV-2 (hCoV-2/human/Liverpool/REMRQ0001/2020), was  
123 used as described previously<sup>30, 31</sup>.

124

125 Animal work was approved by the local University of Liverpool Animal Welfare and  
126 Ethical Review Body and performed under UK Home Office Project Licence  
127 PP4715265. Transgenic mice carrying the human ACE2 gene under the control of the  
128 keratin 18 promoter (K18-hACE2; formally B6.Cg-Tg(K18-ACE2)2PrImn/J) were  
129 purchased from Jackson Laboratories (France) at 8 – 10 weeks of age. Mice were  
130 maintained under SPF barrier conditions in individually ventilated cages and  
131 underwent a week of acclimatisation in these conditions prior to experimental use.

132

133 Experimental design is shown in Fig. 1 and treatment groups detailed in Table 1.  
134 Animals were randomly assigned into multiple cohorts of four animals using a random  
135 number generator. For operational reasons at high containment the treatment groups  
136 were not blinded during the experiment. Sample size was determined using prior  
137 experience of similar experiments with SARS-CoV-2. For SARS-CoV-2 infection, mice  
138 were anaesthetized lightly with isoflurane and inoculated intra-nasally with 50 µl  
139 containing 10<sup>4</sup> PFU SARS-CoV-2 in PBS as described previously<sup>26</sup>. Some cohorts of  
140 mice were immunosuppressed by treatment with cyclophosphamide (100 mg/kg) intra-  
141 peritoneally (IP) at day -4 and -1 pre-infection. Molnupiravir was made up in 10%  
142 PEG400 and 2.5% cremophor in water and used at 100 mg/kg. Nirmatrelvir was  
143 dissolved in 2% Tween 80 in 98% (v/v) of 0.5% methyl cellulose and used at 500  
144 mg/kg. Both drugs were administered via the oral route one hour prior to infection and  
145 then twice daily up to 4 days post-infection via the oral (PO) route. Groups of animals  
146 were kept in the same cages during the experiment and were always weighed and  
147 treated in the same order. Mice were sacrificed at day 6 (vehicle and  
148 cyclophosphamide treated group) or 7 (all others) after infection by an overdose of  
149 pentobarbitone. Weights were recorded daily, and tissues were removed immediately  
150 for downstream processing. The right lung and nasal turbinates were frozen at -80 °C  
151 until further processing. The left lung and heads were fixed in 10% neutral buffered  
152 formalin for 24-48 h and then stored in 70%. No data were excluded from the analyses.

## 153 **Histology, immunohistology and morphometric analysis**

154 The fixed left lung was routinely paraffin wax embedded. Heads were sawn  
155 longitudinally in the midline using a diamond saw (Exakt 300; Exakt) and the brain left  
156 in the skull. Heads were gently decalcified in RDF (Biosystems) for twice 5 days, at  
157 room temperature and on a shaker, then both halves paraffin wax embedded.  
158 Consecutive sections (3-5  $\mu\text{m}$ ) were either stained with hematoxylin and eosin (HE)  
159 or used for immunohistology (IH). IH was performed to detect viral antigen expression  
160 using the horseradish peroxidase method and a rabbit anti-SARS-CoV nucleocapsid  
161 protein (Rockland, 200-402-A50) as primary antibody, as previously described<sup>26, 32,</sup>  
162<sup>33</sup>.

163 For morphometric analysis, the immunostained sections were scanned (NanoZoomer-  
164 XR C12000; Hamamatsu, Hamamatsu City, Japan) and analysed using the software  
165 program Visiopharm (Visiopharm 2020.08.1.8403; Visiopharm, Hoersholm, Denmark)  
166 to quantify the area of viral antigen expression in relation to the total area (area  
167 occupied by lung parenchyma) in the sections. This was used to compare the extent  
168 of viral antigen expression in the lungs between the different treatment groups. A first  
169 app was applied that outlined the entire lung tissue as ROI (total area). For this a  
170 Decision Forest method was used and the software was trained to detect the lung  
171 tissue section (total area). Once the lung section was outlined as ROI the lumen of  
172 large bronchi and vessels was manually excluded from the ROI. Subsequently, a  
173 second app with Decision Forest method was trained to detect viral antigen expression  
174 (as brown DAB precipitate) within the ROI.

175

## 176 **qRT-PCR for viral load**

177 Viral loads were quantified using the GoTaq® Probe 1-Step RT-qPCR System  
178 (Promega). For quantification of SARS-COV-2 the nCOV\_N1 primer/probe mix from  
179 the SARS-CoV-2 (2019-nCoV) CDC qPCR Probe Assay (IDT) were utilised and  
180 murine 18S primers as described previously<sup>25, 26</sup>.

181

## 182 **Sequencing of SARS-CoV-2**

183 Library preparation consisted of converting RNA to cDNA using LunaScript™  
184 (Thermofisher), then amplified by reverse complement (RC)-PCR amplification  
185 (EasySeq™ SARS-CoV-2 Whole Genome Sequencing kit, Nimagen, Netherlands).  
186 This kit barcodes and ligates Illumina adapters in a single PCR reaction, with two

187 separate pools of primers (pools 1 and 2). After amplification, each amplicon library  
188 was pooled 1:1 before being cleaned with AmpliClean™ beads and quantification. The  
189 two pools were then added together and denatured. Finally, the denatured amplicon  
190 library was loaded into the NovaSeq cartridge (2 x 150 bp run).

191

## 192 **Bioinformatics**

193 Supplementary Fig. S2 provides an overview of the workflow used in this study. In  
194 short, raw paired end fastq files were inputted into the EasySeq pipeline to generate  
195 alignment files, vcf's and consensus sequences <sup>34</sup>. Consensus sequences were  
196 inputted into Nextclade for lineage assignment and bam files were inputted into  
197 DiversiTools (<https://github.com/josephhughes/DiversiTools>) to assess minor  
198 variation. Sequencing data was analysed as previously described and statistical  
199 analysis and visualisation was performed in R <sup>22</sup>. Raw fastq files are available under  
200 SRA Project Accession: PRJNA886870. Code for analysis and figure generation is  
201 available at [https://github.com/Hiscox-lab/viral-genomics-immunosuppression-and-](https://github.com/Hiscox-lab/viral-genomics-immunosuppression-and-countermeasures)  
202 [countermeasures](https://github.com/Hiscox-lab/viral-genomics-immunosuppression-and-countermeasures).

203

## 204 **Statistics**

205 Graphs were prepared and statistics performed using Prism 10 (Graphpad Inc). *P*  
206 values were set at 95% confidence interval. A repeated-measures two-way ANOVA  
207 (Bonferroni post-test) was used for time-courses of weight loss; log-rank (Mantel-Cox)  
208 test was used for survival curve and Mann-Whitney *U* test for side-by-side  
209 comparisons. All differences not specifically stated to be significant were not  
210 significant ( $p > 0.05$ ). For all figures,  $*p < 0.05$ .



## 211 **Results and Discussion**

212

213 Since the emergence of the Alpha VOC there has been discussion on the involvement  
214 of the immunocompromised host and the generation of variants <sup>8, 35-39</sup>. There are many  
215 case studies in the literature that follow SARS-CoV-2 evolution in  
216 immunocompromised hosts, however, little has been explored experimentally. In this  
217 study, mice were chemically immunocompromised with cyclophosphamide which is  
218 known to efficiently remove adaptive immunity in the form of B and T cells <sup>40</sup>.  
219 Additionally, therapeutic agents, molnupiravir and nirmatrelvir, were used  
220 independently and in combination to determine the effectiveness of these compounds  
221 in an immunocompromised model, and the impact of these compounds on viral  
222 sequence diversity.

223

224 Modelling an immunocompromised state in animal models in the context of SARS-  
225 CoV-2 is important for the consideration of countermeasures that may be utilised for  
226 humans who are considered vulnerable. Cyclophosphamide has been used previously  
227 to study the impact of immunosuppression in a hamster model <sup>41-43</sup>, where intranasally  
228 infected hamsters with cyclophosphamide treatment before infection had prolonged  
229 weight loss and an inadequate neutralising antibody response to SARS-CoV-2.  
230 Distinct transcriptional profiles were identified between immunocompetent and  
231 immunosuppressed animals; however, the impact of antivirals or viral genome  
232 diversity was not investigated.

233

234 To investigate the frequency of genomic changes that occur in SARS-CoV-2 in the  
235 immune compromised or competent host in the presence or absence of antiviral drugs,  
236 K18-hACE2 transgenic mice were used as a model for severe SARS-CoV-2 infection  
237 in humans <sup>44</sup>. We have found that the pathological changes in the lungs in this model  
238 in many aspects resemble those in humans who have died of severe COVID-19 <sup>26, 28,</sup>  
239 <sup>29, 32, 33</sup>. To mimic a host with compromised immunity, an experimental protocol was  
240 developed in which mice were exposed to cyclophosphamide <sup>40</sup> (Fig. 1, Table 1).  
241 Several anti-viral regimes in humans were simulated in the mouse model by giving a  
242 human equivalent dose of either molnupiravir (100 mg/kg), nirmatrelvir (500 mg/kg) or  
243 both in combination. This included prophylactic followed by therapeutic treatment.  
244 Mice were infected with 10<sup>4</sup> PFU of SARS-CoV-2.



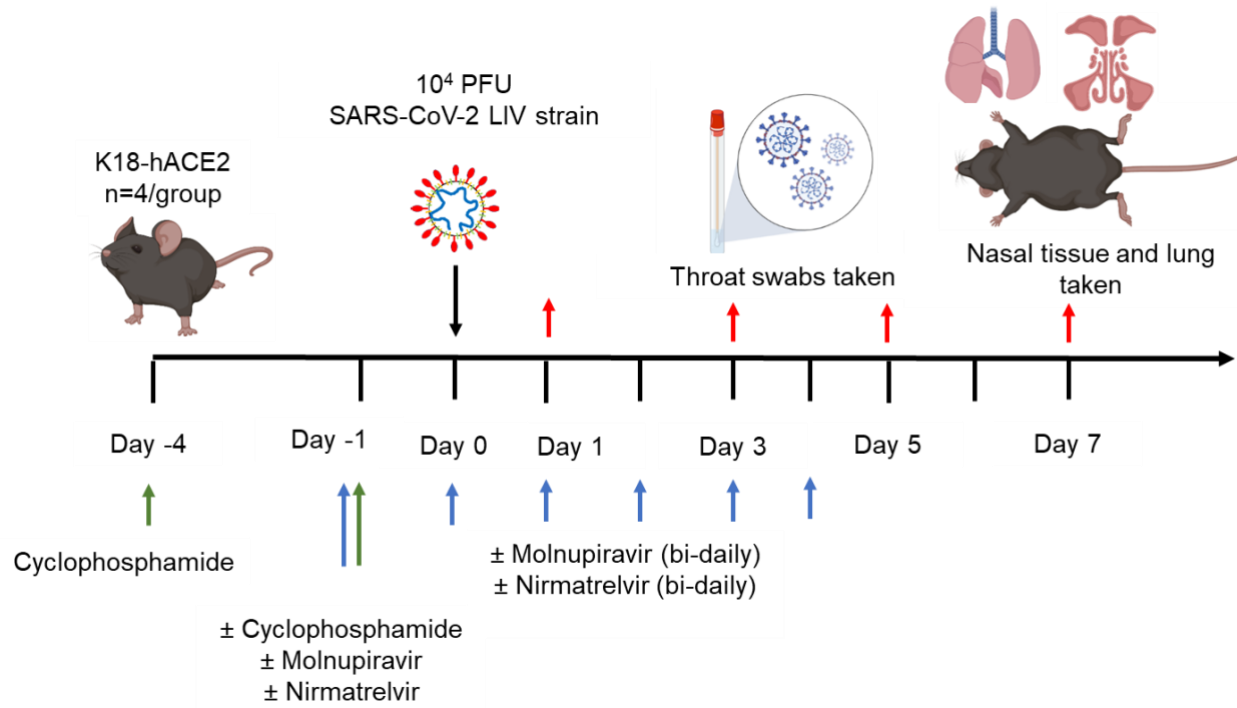

**Figure 1.** Schematic diagram of the experimental design for infection of immune compromised K18-hACE2 mice with SARS-CoV-2 and evaluation of two antiviral drugs given at a human equivalent dose; molnupiravir, a broad acting compound causing error catastrophe, or nirmatrelvir which specifically targets the viral 3C-like protease. Cyclophosphamide was used at 100 mg/kg via the intraperitoneal route to immunosuppress mice. Molnupiravir was used at 100 mg/kg and nirmatrelvir at 500 mg/kg both via the oral route. Effects of infection and treatment were evaluated by measuring the weight of the mice daily, determining viral loads in sequential oral/throat swabs and at day 7 post-infection, and examining nose, brain and lung at day 7 post infection for any histological changes and the expression of SARS-CoV-2 nucleoprotein.

245

#### 246 Table 1. Treatment groups for in vivo analysis

| Group | Treatment                                      |
|-------|------------------------------------------------|
| 1     | Control (vehicle)                              |
| 2     | Cyclophosphamide                               |
| 3     | Molnupiravir                                   |
| 4     | Cyclophosphamide + molnupiravir                |
| 5     | Cyclophosphamide + nirmatrelvir                |
| 6     | Cyclophosphamide + molnupiravir + nirmatrelvir |

247

248

249 **Treatment with Molnupiravir or Nirmatrelvir either individually or in combination**  
250 **provides recovery in immune compromised mice infected with SARS-CoV-2.**

251 Cyclophosphamide treatment prior to SARS-CoV-2 infection of hACE2 mice led to a  
252 more pronounced early weight loss in comparison to immunocompetent mice, a  
253 phenomenon previously reported in hamsters <sup>43</sup>. This was not associated with earlier  
254 mortality than in vehicle treated immunocompetent mice, although in human, a  
255 delayed adaptive immune response has been shown to be associated with fatality in  
256 COVID-19 patients, which may have been observed over longer timeframes <sup>45</sup>. Daily  
257 weighing of the animals indicated that all groups lost body weight after day 1 (Fig. 2).  
258 We attribute this to aversion to eating as all therapies were applied by gavage.  
259 However, starting at day 3 all groups, except for mice exposed to cyclophosphamide,  
260 or mice exposed to cyclophosphamide and treated with molnupiravir, started to gain,  
261 or stabilise weight. By days 5 and 6 a clear pattern had emerged where all groups  
262 treated with molnupiravir or nirmatrelvir either individually or in combination had  
263 regained their starting weight. The exception to this were mice exposed to vehicle only  
264 (controls) or cyclophosphamide; these reached a humane end point on day 6 (Fig. 2).  
265 Comparison of survival curves again indicated that immune compromised animals  
266 treated either singly or in combination with each therapeutic went on to survive (Fig.  
267 3).

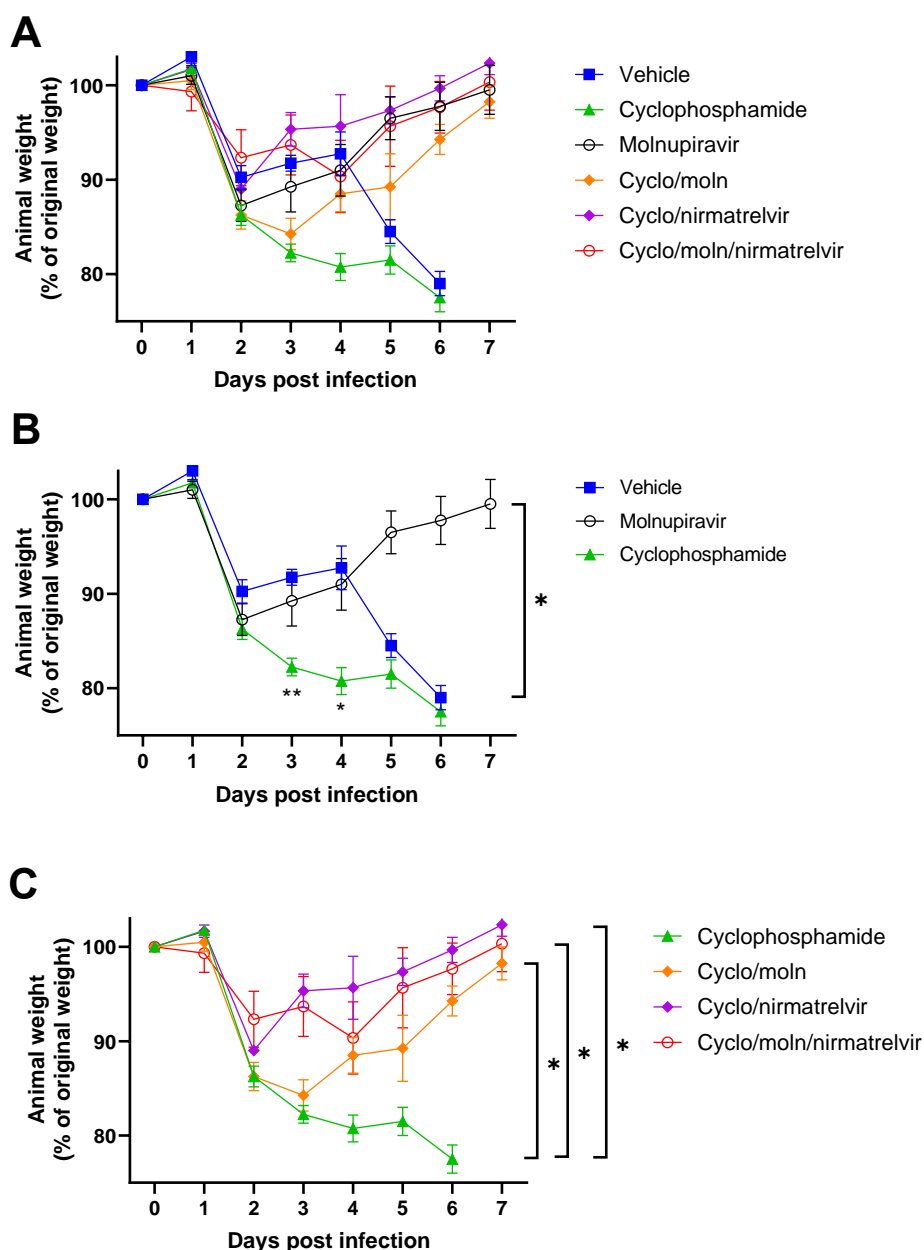

268

269 **Figure 2: Treatment of SARS-CoV-2-infected immunocompromised mice leads**  
 270 **to decreased weight loss.** K18-hACE2 mice were challenged intranasally with  $10^4$   
 271 PFU SARS-CoV-2 and their body weight monitored at indicated time-points ( $n = 4$ ).  
 272 Data represent the mean residual weight  $\pm$  SEM. Comparisons were made using a  
 273 repeated-measures two-way ANOVA (Bonferroni post-test). \* Represents  $P < 0.05$ .  
 274 Data from the same experiment were presented differently grouped in three separate  
 275 graphs for clarity. (A) Curves for all groups. (B) Curves for vehicle, cyclophosphamide  
 276 and molnupiravir groups. Asterisks below the curves represent \*  $P < 0.05$  and \*\*  $P <$   
 277  $0.01$  between the cyclophosphamide and vehicle groups. (C) Curves for the groups  
 278 treated with cyclophosphamide. Panels B and C were plotted using data shown in A  
 279 but for added clarity.

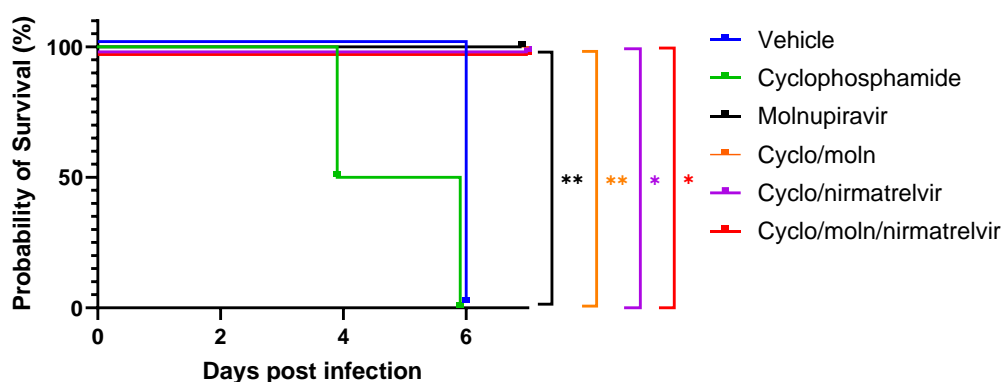

280

281 **Figure 3: Treatment of SARS-CoV-2-infected mice leads to enhanced survival.**  
282 *K18-hACE2 mice were challenged intranasally with  $10^4$  PFU SARS-CoV-2. Survival*  
283 *was assessed at indicated time points and significance determined using log rank*  
284 *(Mantel-Cox) test ( $n = 4$ ).*  
285

286 **Viral load decreases in immune compromised mice treated with Molnupiravir or**  
287 **Nirmatrelvir either individually or in combination.**

288 Viral load in terms of copy numbers of the SARS-CoV-2 genome were calculated for  
289 throat swabs during infection and compared to nasal tissue and lung tissue at the end  
290 of the experiment. The data indicated that for throat swabs on days 1 and 3 post-  
291 infection there was a significant decrease in viral load in animals treated with  
292 molnupiravir or nirmatrelvir either individually or in combination compared to untreated  
293 controls (Figure 4A). At day 3 there was a significant difference between both  
294 compounds used in combination and molnupiravir only (Figure 4A). No significant  
295 differences were observed between vehicle control and cyclophosphamide only  
296 groups.

297

298 Comparison of viral loads and titres in nasal and lung tissue respectively (Figure 4B  
299 and 4C, respectively) at day 7 post-infection reflected that there was a significantly  
300 lower viral load in animals treated with molnupiravir or nirmatrelvir either individually  
301 or in combination compared to untreated mice. However, nirmatrelvir treatment  
302 resulted in a greater decrease in viral load compared to molnupiravir. The  
303 molnupiravir/nirmatrelvir combination was also more effective at decreasing viral load  
304 than either drug alone, but this was only statistically significant in the case of  
305 molnupiravir vs the drug combination.

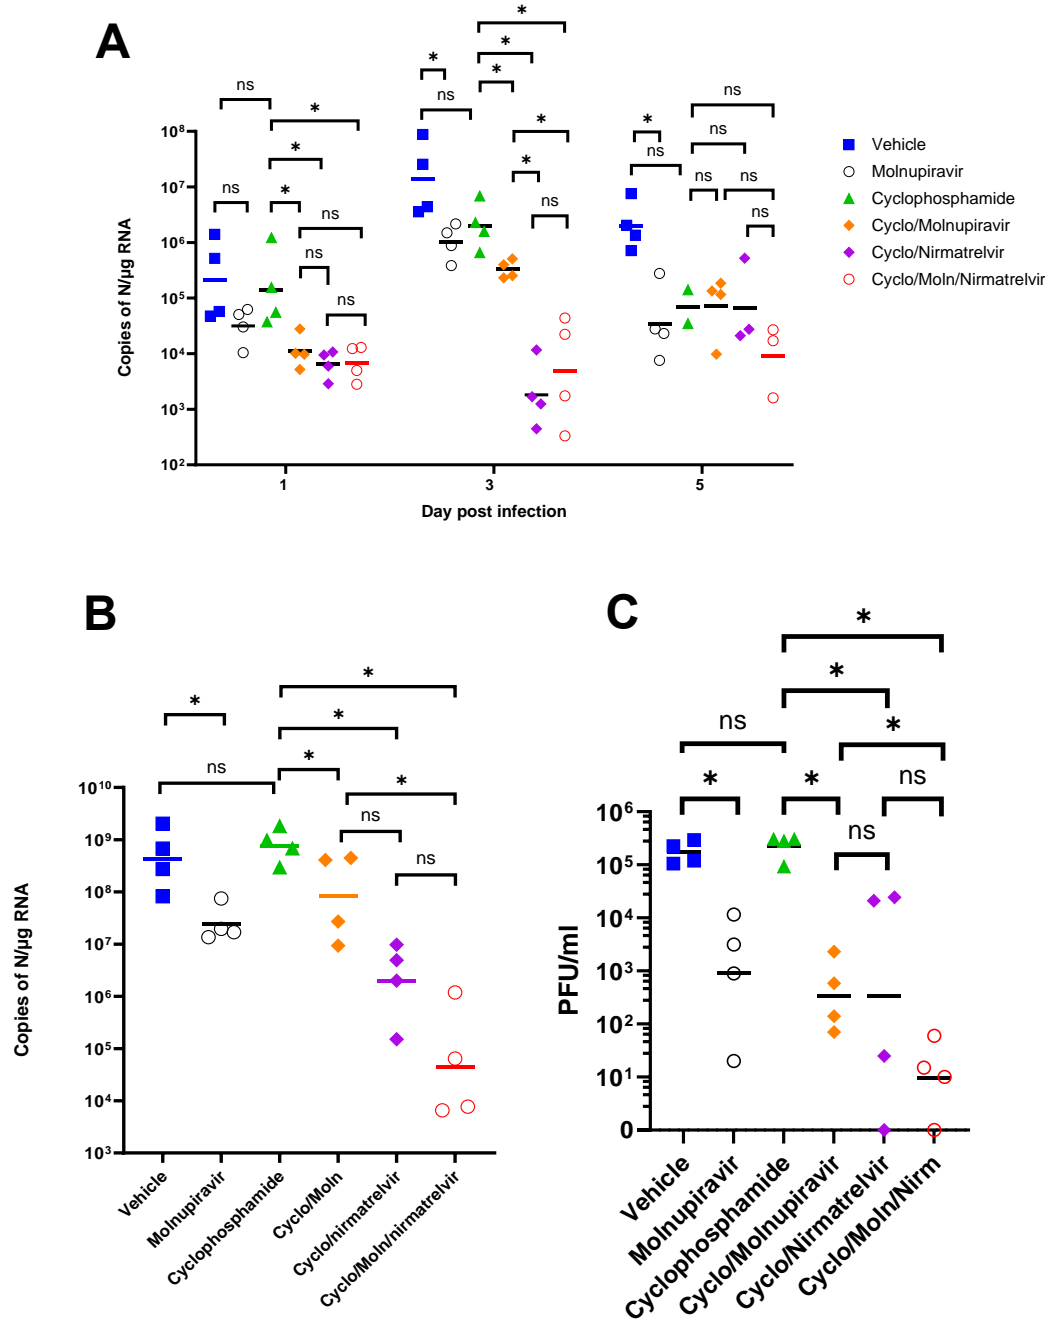

306

307 **Figure 4. Viral loads in swabs and tissues.** K18-hACE2 mice were challenged  
 308 intranasally with  $10^4$  PFU SARS-CoV-2 and treated as indicated ( $n = 4$  per group).  
 309 RNA extracted from oral/throat swabs and nasal tissue was analysed for virus RNA  
 310 load using qRT-PCR and primers specific for the SARS-CoV-2 N gene. Assays were  
 311 normalised relative to levels of 18S RNA. Lung tissue was analysed for live virus by  
 312 plaque assay. Data for individual animals are shown with the median value  
 313 represented by a black line. (A) Throat swabs; (B) nasal tissue; (C) lung tissue.  
 314 Comparisons were made using two-way ANOVA (Bonferroni post-test) in panel A and  
 315 Mann-Whitney U test (Panels B and C). \* Represents  $p < 0.05$ .

316

317 **Treatment with molnupiravir or nirmatrelvir or both in combination results in**  
318 **marked reduction of pulmonary infection and inhibits viral spread to the brain.**

319 The lung, nose and brain of all animals were examined for any histopathological  
320 changes and the expression of viral antigen by immunohistology, to determine  
321 whether treatment of the animals with molnupiravir and/or nirmatrelvir influenced the  
322 outcome of infection. The lungs of vehicle treated, immunocompetent animals showed  
323 the typical changes previously reported in K18-hACE2 mice infected with this virus  
324 strain <sup>26</sup>, i.e. multifocal areas with pneumocyte degeneration, type II pneumocyte  
325 activation, mild neutrophil infiltration, and mild vasculitis, with a diffuse increase in  
326 interstitial cellularity and widespread SARS-CoV-2 antigen expression in alveolar  
327 epithelial cells (Fig. 5A). In mice that had received cyclophosphamide alone, the  
328 changes were very similar, but slightly less widespread, with some unaltered  
329 parenchyma and less extensive viral antigen expression (Fig. 5B). With molnupiravir  
330 treatment, both inflammatory processes and viral antigen expression were markedly  
331 decreased; indeed, SARS-CoV-2 antigen was only found in disseminated patches of  
332 alveoli with positive pneumocytes (Fig. 5C). With cyclophosphamide and molnupiravir  
333 treatment, the lung parenchyma was widely unaltered, and there were only small  
334 patches of inflammation and alveoli with viral antigen expression, respectively (Fig.  
335 5D). These were further reduced in number and size in animals that had received  
336 cyclophosphamide and nirmatrelvir (Fig. 5E). Treatment with all three compounds,  
337 cyclophosphamide, molnupiravir and nirmatrelvir, resulted in widely unaltered lung  
338 parenchyma with no or minimal viral antigen expression (Fig. 5F). The morphometric  
339 analysis to quantify the extent of viral antigen expression in the lungs in the different  
340 groups of animals confirmed that the various antiviral treatment regimens significantly  
341 reduced the extent of lung infection (Figure S1).



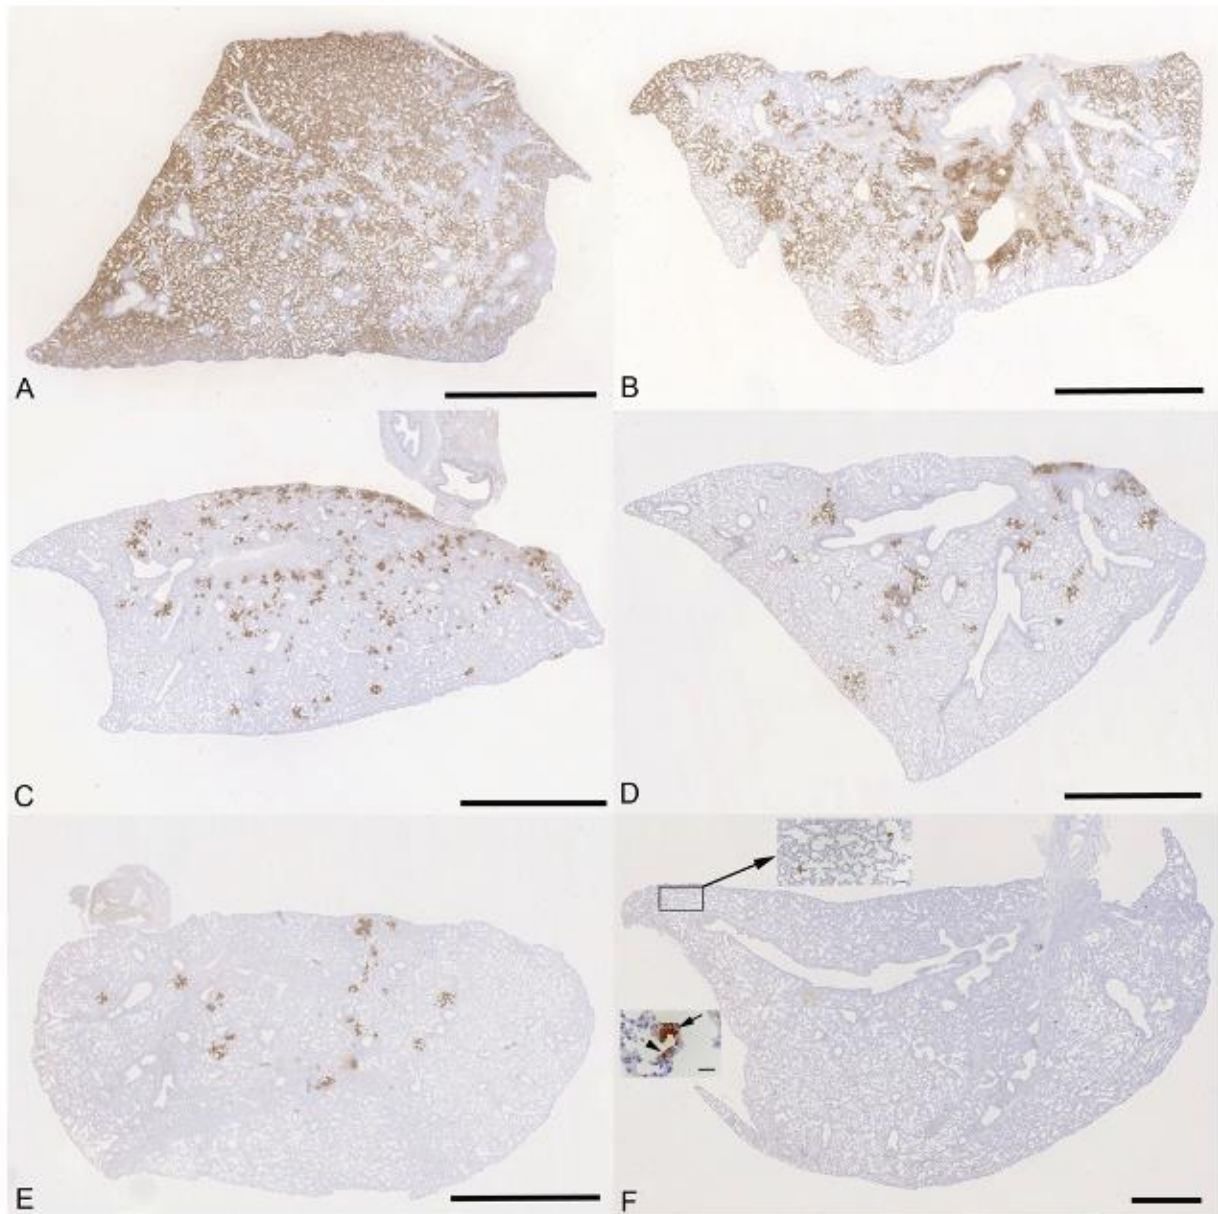

342

343 **Figure 5:** *K18-hACE2 mice were challenged intranasally with  $10^4$  PFU SARS-CoV-2 and*  
344 *treated as indicated below (n = 4 per group). Immunohistology for the detection of viral antigen*  
345 *in the lung at day 6 or 7 post infection. Sections from the formalin-fixed, paraffin embedded*  
346 *left lung lobe were stained using anti-SARS-CoV nucleoprotein and counterstained with*  
347 *hematoxylin. Representative images from the individual treatment groups are shown as*  
348 *follows: A. vehicle; B. cyclophosphamide; C. molnupiravir; D. cyclophosphamide and*  
349 *molnupiravir; E. cyclophosphamide and nirmatrelvir; F. cyclophosphamide, molnupiravir and*  
350 *nirmatrelvir. Viral antigen expression is restricted to pneumocytes in a few individual alveoli*  
351 *(higher magnifications in insets). Bars represent 2.5 mm (A-E), 1 mm (F) and 20  $\mu$ m (F, insets).*



352 Examination of the heads using longitudinal sections (midline) revealed consistent and  
353 widespread infection of the brain in animals treated with the vehicle or with  
354 cyclophosphamide alone (Fig. 6A, B); this was associated with mild perivascular  
355 mononuclear infiltration in particular in the brain stem, as described before in K18-  
356 hACE2 mice infected with this virus strain <sup>33</sup>. In both groups of animals,  
357 immunohistology confirmed viral antigen expression in the respiratory and/or olfactory  
358 epithelium, in the latter with evidence of infection in olfactory sensory neurons (Fig.  
359 6A, B). In the other groups, there was no evidence of viral infection of the brain (Fig.  
360 6C-F), and viral antigen expression in the nasal mucosa was not seen or restricted to  
361 scattered individual epithelial cells. In vehicle control and cyclophosphamide mice, the  
362 nasal mucosa harboured viral antigen at this stage, in the respiratory epithelium and  
363 in the olfactory epithelium; in the latter it also appeared to be present in sensory  
364 neurons. Consequently, the virus had reached and spread widely in the brain where it  
365 was detected in neurons; the infection was associated with mild inflammatory  
366 response in particular in the brain stem, as described before in K18-hACE2 mice  
367 infected with this virus strain <sup>26, 33</sup>. After treatment with all three compounds,  
368 cyclophosphamide, molnupiravir and nirmatrelvir, the lung parenchyma was basically  
369 unaltered, with no or minimal viral antigen expression. In all groups of mice, viral  
370 antigen expression in the nasal mucosa was not seen or restricted to scattered  
371 individual epithelial cells and there was no evidence of viral infection of the brain,  
372 suggesting that the antiviral treatment blocked infection of the brain. Whether the latter  
373 is purely a consequence of reduced viral replication in the upper respiratory tract  
374 cannot be assessed in the present study; it does, however, appear likely.

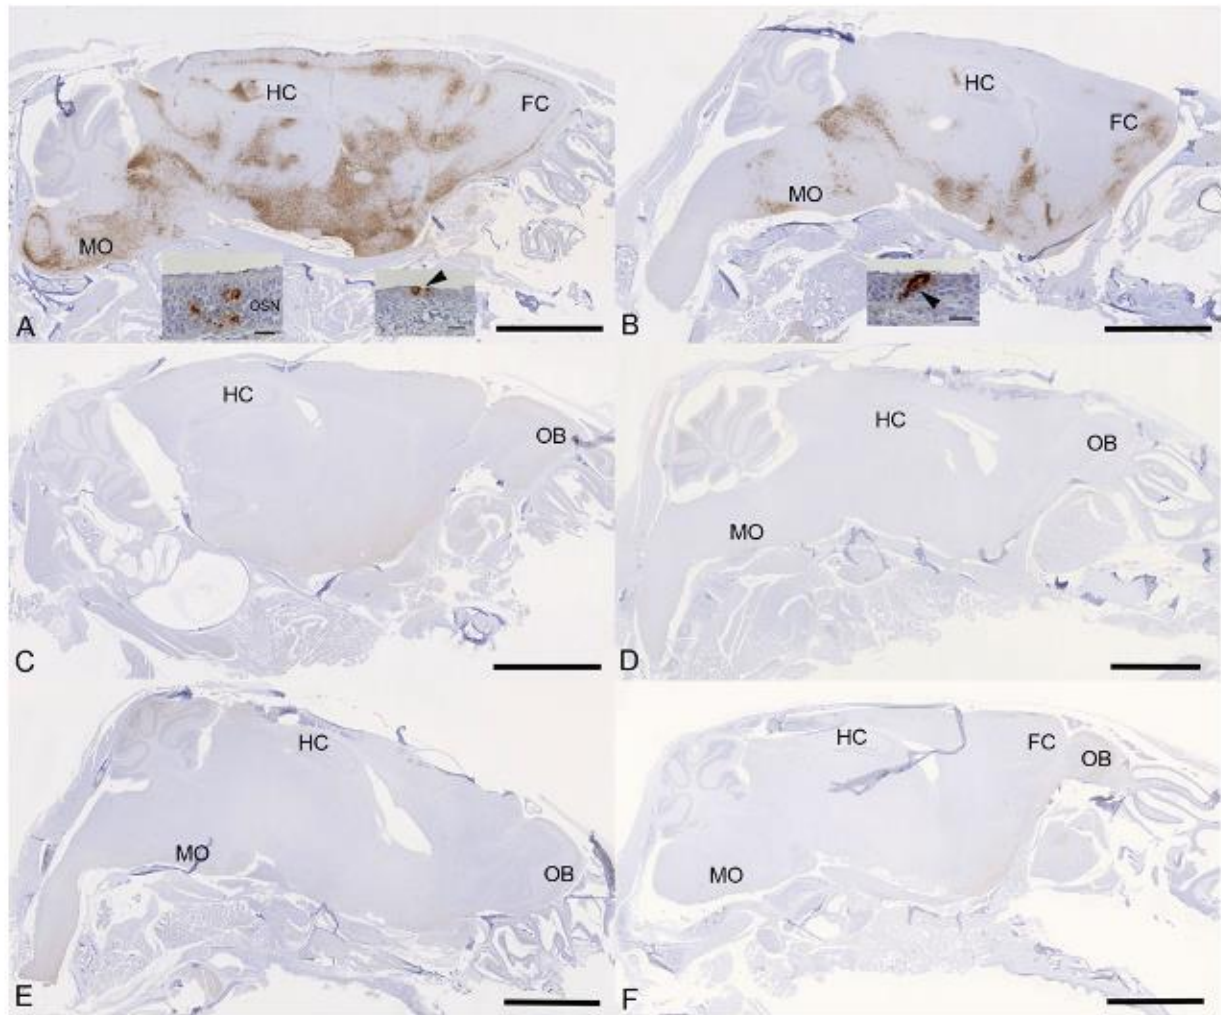

375

376 **Figure 6:** K18-hACE2 mice were challenged intranasally with  $10^4$  PFU SARS-CoV-2 and  
377 treated as indicated below ( $n = 4$  per group). Immunohistology for the detection of viral antigen  
378 in the brain and nose at day 6 or 7 post infection. Sections from formalin-fixed, decalcified and  
379 paraffin embedded heads after longitudinal sawing in the midline were stained using anti-  
380 SARS-CoV nucleoprotein, and counterstained with hematoxylin. Only small fragments of  
381 nasal mucosa were available for the examination, as the nasal turbinates had been sampled  
382 for PCR. Representative images from the individual treatment groups are shown as follows:  
383 **A.** Vehicle. There is widespread infection of the brain. The insets show infection of individual  
384 cells with the morphology of olfactory sensory neurons and epithelial cells in the olfactory  
385 epithelial layer (left inset) and individual respiratory epithelial cells in the nasal mucosa  
386 (arrowhead; right inset); **B.** Cyclophosphamide. There is widespread infection of the brain.  
387 The inset shows a group of positive epithelial cells/sensory neurons in the olfactory epithelial  
388 layer (arrowhead); **C.** Molnupiravir. There is no evidence of brain infection. **D.**  
389 Cyclophosphamide and molnupiravir. There is no evidence of brain infection. **E.**  
390 Cyclophosphamide and nirmatrelvir. There is no evidence of brain infection. **F.**  
391 Cyclophosphamide, molnupiravir and nirmatrelvir. There is no evidence of brain infection. Bars  
392 represent 2.5 mm (A-F) and 20  $\mu$ m (A, B insets). FC – frontal cortex, HC – hippocampus, MO  
393 – medulla oblongata, OB – olfactory bulb, OSN - olfactory sensory neurons.

## 394 **Evaluation of dominant and minor variants in SARS-CoV-2**

395 To determine the impact of immunosuppression on viral diversity, 116 RNA samples  
396 from swabs and tissue were sequenced and analysed using the EasySeq WGS  
397 protocol by Nimagen. alignment files and associated index files were inputted into  
398 DiversiTools to provide mutation data and outputs were analysed in R. Samples with  
399 less than 90% breadth of coverage were discarded for mutational analysis (n=12), as  
400 well as samples that returned bad or mediocre quality scores in nextclade (n=13). The  
401 samples that were excluded were associated with higher Ct values and later time  
402 points belonging in the nirmatrelvir treatment groups. Sequencing data from 89  
403 samples were taken forward in the analysis (swab, n=50, tissue n=39, Supplementary  
404 Table S1).

405

406 The input virus contained 5 substitutions and 3 amino acid substitutions in comparison  
407 to the reference sequence and were thus not considered as changes during the  
408 analysis (Supplementary Table S2). The S: H655Y mutation was present in 76% of  
409 the genomes that passed QC at the dominant level and observed as a minor variant  
410 across all samples (Supplementary Fig. S3). This mutation has been reported  
411 previously as a spike adaptation to other species such as cats, hamsters, and mink <sup>46-</sup>  
412 <sup>48</sup> and of course has independently arisen in human lineages such as Omicron <sup>49</sup>. As  
413 this mutation was clearly associated with a species adaptation, it was disregarded for  
414 the evaluation of treatment and immune status driven mutations. The other mutations  
415 appear to be novel at the time of writing; however, no distinct group was associated  
416 with driving these mutations, and can be overall interpreted as a rare event. The  
417 sequences showing the highest number of mutations were sequences derived from  
418 tissue samples. Species specific adaptations were more frequently reported in the  
419 dataset than the immunocompromised and antiviral environments, putting the  
420 evolutionary pressures into perspective.

421

## 422 **Molnupiravir increases the Ts/Tv ratio at the minor variant level in genomes** 423 **derived from swabs**

424 To further assess the impact of immunocompromising mice by cyclophosphamide,  
425 and the therapeutic agents molnupiravir and the nirmatrelvir, a minor variant analysis  
426 was conducted on samples derived from throat swabs. The average  
427 transition/transversion (Ts/Tv) ratio for SARS-CoV-2 genomes from each mouse and

428 the mean of each group was compared across cohorts. On day 1, an increase in Ts/Tv  
429 ration was observed in the molnupiravir cohort and the cyclophosphamide and  
430 molnupiravir cohort and had a p value < 0.05 when compared to the vehicle control  
431 and cyclophosphamide only groups (Fig. 7). The number of samples analysed for  
432 cyclophosphamide and nirmatrelvir only was too small for statistical analysis, however,  
433 the trend resembles that of vehicle and cyclophosphamide only. Likewise, the  
434 combined cyclophosphamide and molnupiravir and nirmatrelvir cohort only resembles  
435 one genome, however, the trend resembles that of other genomes with exposure to  
436 molnupiravir. The same is observed at day 3 of sampling, however, there is a  
437 significant difference between the mean Ts/Tv ratio between the molnupiravir only and  
438 cyclophosphamide and molnupiravir groups. Importantly, the Ts/Tv ratios between the  
439 vehicle control and cyclophosphamide only groups resemble each other. The  
440 proportion of base changes were also observed, with particular interest in the C to U  
441 and G to A transitions as previously seen in a phase II clinical trial <sup>22</sup> (Figure 8).

442

443 Further investigations are warranted to understand completely the role of  
444 immunocompromised individuals in the development of SARS-CoV-2 variants. It is  
445 more likely that immunodeficiency promotes viral persistence providing the virus  
446 more opportunity to replicate and introduce mutations. Molnupiravir, compared to  
447 nirmatrelvir, shows a stronger mutagenic effect in this model at the minor variant  
448 level, however, data is insufficient to make conclusions regards consensus level  
449 changes over the timeframes used in this study. When these therapies are used  
450 individually or in combination, there is successful depletion in viral load and animals  
451 recover from infection, whilst preventing infiltration into brain tissue. Given the  
452 concern of molnupiravir associated lineages in circulation <sup>23</sup>, combination therapy  
453 may reduce this through more effective clearance of the virus <sup>20</sup>, although this would  
454 need to be evaluated over time in a real-world setting as the mutational signatures  
455 were observed in the combined therapy group.

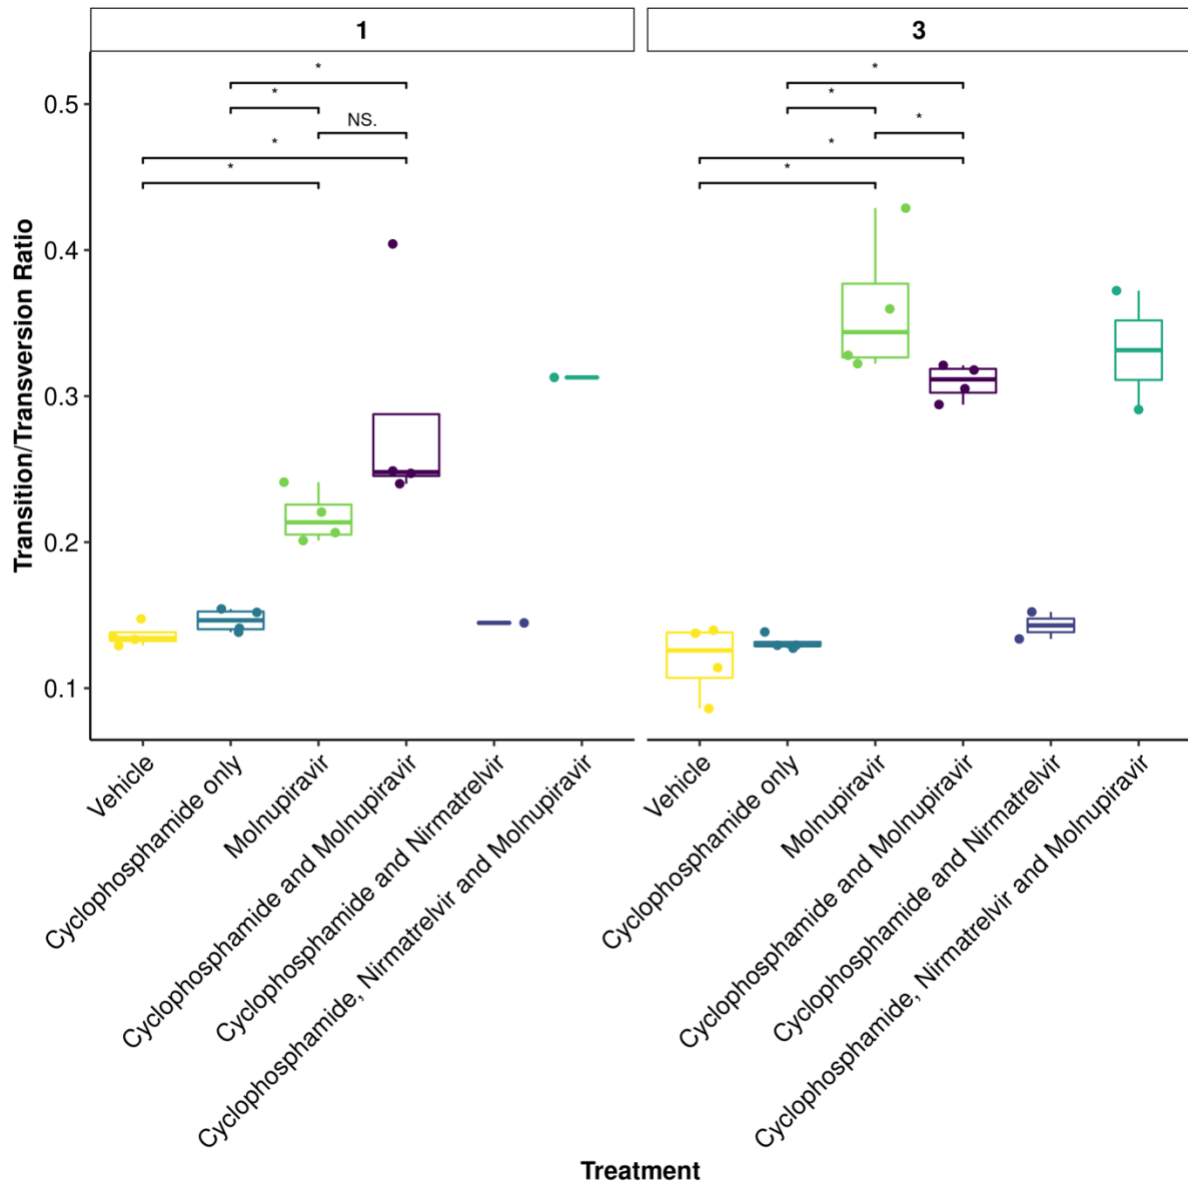

456

457 **Figure 7:** The mean  $T_s/T_v$  ratio per genome plotted as boxplots. The plot is faceted by day  
458 post infection. Less genomes were recovered for cyclophosphamide and nirmatrelvir and  
459 cyclophosphamide, nirmatrelvir and molnupiravir, therefore statistical analysis returns the  
460 differences as non-significant. Trends can be concluded with caution. \* Represents a  $P$  value  
461  $<0.05$  (Mann Whitney U test).

DPI 1 3

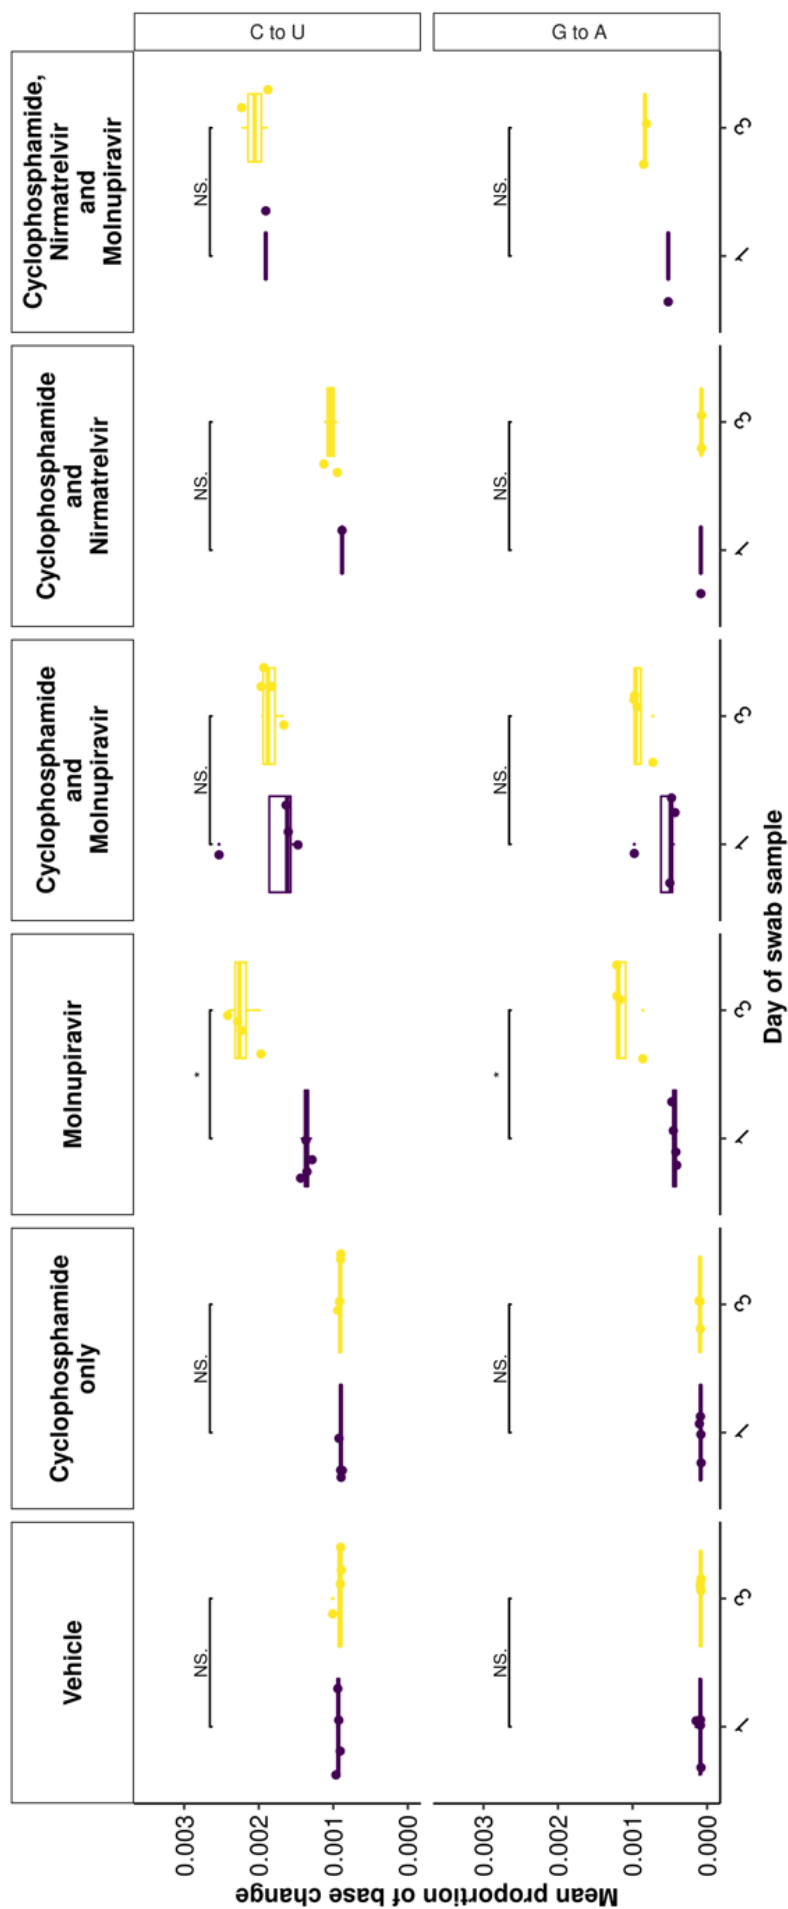

**Figure 8:** C to U and G to A minor variation changes significantly increased between day 1 and day 3 post infection in the molnupiravir only group. A similar trend is observed between other groups including molnupiravir treatment, however, the change is not reported as significant. \* represents a P value <0.05 (Mann Whitney U test).



## 463 **Acknowledgements**

464 The authors are grateful to the technical staff at the Histology Laboratory, Institute of  
465 Veterinary Pathology, Vetsuisse Faculty, University of Zurich, for excellent technical  
466 support. JAH is a member of the ISARIC4C consortium  
467 (<https://isaric4c.net/about/authors/>), and we thank them for the use of the SARS-CoV-  
468 2 isolate used in this study.

469

## 470 **Funding**

471 This work was funded by the MRC (MR/W005611/1) 'G2P-UK: A national virology  
472 consortium to address phenotypic consequences of SARS-CoV-2 genomic variation'  
473 and MR/Y004205/1 'The G2P2 virology consortium: keeping pace with SARS-CoV-2  
474 variants, providing evidence to vaccine policy, and building agility for the next  
475 pandemic' (co-Is JPS and JAH) and funded in part by U.S. Food and Drug  
476 Administration Medical Countermeasures Initiative contract (75F40120C00085) to  
477 JAH. The article reflects the views of the authors and does not represent the views or  
478 policies of the FDA. Additionally, DNDi under the support by the Wellcome Trust  
479 (Grant ref: 222489/Z/21/Z to AO and JPS) through the 'COVID-19 Therapeutics  
480 Accelerator'. A.O. acknowledges funding by Wellcome Trust (222489/Z/21/Z), EPSRC  
481 (EP/R024804/1; EP/S012265/1) and National Institute of Health (NIH) (R01AI134091;  
482 R24AI118397). J.P.S. also acknowledges funding from the Medical Research Council  
483 (MRC) (MR/R010145/1, MR/W021641/1, PA6162\_G2P2-2023), BBSRC  
484 (BB/R00904X/1; BB/R018863/1; BB/N022505/1) and Innovate UK  
485 (TS/W022648/1). A.K. received support from the Swiss National Science Foundation  
486 (SNSF; IZSEZ0 213289).

487

## 488 **Transparency Declaration**

489 A.O. is a director of Tandem Nano Ltd and co-inventor of patents relating to drug  
490 delivery. A.O. has been co-investigator on funding received by the University of  
491 Liverpool from ViiV Healthcare and Gilead Sciences in the past 3 years unrelated to  
492 COVID-19. A.O. has received personal fees from Gilead and Assembly Biosciences  
493 in the past 3 years, also unrelated to COVID-19. JPS has received funding from ENA  
494 respiratory Pty Ltd, Bicycle Tx Ltd, and Infex Therapeutics Ltd unrelated to this study.  
495 R.P.R. is an employee at TopMD Precision Medicine Ltd. No other conflicts are  
496 declared by the authors.

497



## 498 References

- 499 1. Moore SC, Penrice-Randal R, Alruwaili M et al. Amplicon-Based Detection and  
500 Sequencing of SARS-CoV-2 in Nasopharyngeal Swabs from Patients With COVID-19  
501 and Identification of Deletions in the Viral Genome That Encode Proteins Involved in  
502 Interferon Antagonism. *Viruses* 2020; **12**.
- 503 2. McCarthy KR, Rennick LJ, Nambulli S et al. Natural deletions in the SARS-  
504 CoV-2 spike glycoprotein drive antibody escape. *bioRxiv* 2020: 2020.11.19.389916.
- 505 3. Korber B, Fischer WM, Gnanakaran S et al. Tracking Changes in SARS-CoV-  
506 2 Spike: Evidence that D614G Increases Infectivity of the COVID-19 Virus. *Cell* 2020;  
507 **182**: 812-27 e19.
- 508 4. Alruwaili M, Armstrong S, Prince T et al. SARS-CoV-2 NSP12 associates with  
509 TRiC and the P323L substitution acts as a host adaptation. *Journal of virology* 2023; **97**:  
510 e0042423.
- 511 5. Goldswain H, Dong X, Penrice-Randal R et al. The P323L substitution in the  
512 SARS-CoV-2 polymerase (NSP12) confers a selective advantage during infection.  
513 *Genome Biology* 2023; **24**: 47.
- 514 6. Wang B, Goh YS, Prince T et al. Resistance of SARS-CoV-2 variants to  
515 neutralization by convalescent plasma from early COVID-19 outbreak in Singapore.  
516 *NPJ Vaccines* 2021; **6**: 125.
- 517 7. Suzuki R, Yamasoba D, Kimura I et al. Attenuated fusogenicity and  
518 pathogenicity of SARS-CoV-2 Omicron variant. *Nature* 2022; **603**: 700-5.
- 519 8. Corey L, Beyrer C, Cohen MS et al. SARS-CoV-2 Variants in Patients with  
520 Immunosuppression. *N Engl J Med* 2021; **385**: 562-6.
- 521 9. Avanzato VA, Matson MJ, Seifert SN et al. Case Study: Prolonged Infectious  
522 SARS-CoV-2 Shedding from an Asymptomatic Immunocompromised Individual with  
523 Cancer. *Cell* 2020; **183**: 1901-12 e9.
- 524 10. Young BE, Fong SW, Chan YH et al. Effects of a major deletion in the SARS-  
525 CoV-2 genome on the severity of infection and the inflammatory response: an  
526 observational cohort study. *Lancet* 2020; **396**: 603-11.
- 527 11. Aljabr W, Alruwaili M, Penrice-Randal R et al. Amplicon and Metagenomic  
528 Analysis of Middle East Respiratory Syndrome (MERS) Coronavirus and the  
529 Microbiome in Patients with Severe MERS. *mSphere* 2021; **6**: e0021921.
- 530 12. Chu DKW, Hui KPY, Perera R et al. MERS coronaviruses from camels in Africa  
531 exhibit region-dependent genetic diversity. *Proc Natl Acad Sci U S A* 2018; **115**: 3144-  
532 9.
- 533 13. El-Kafrawy SA, Corman VM, Tolah AM et al. Enzootic patterns of Middle East  
534 respiratory syndrome coronavirus in imported African and local Arabian dromedary  
535 camels: a prospective genomic study. *Lancet Planet Health* 2019; **3**: e521-e8.
- 536 14. Rottier PJ, Nakamura K, Schellen P et al. Acquisition of macrophage tropism  
537 during the pathogenesis of feline infectious peritonitis is determined by mutations in  
538 the feline coronavirus spike protein. *Journal of virology* 2005; **79**: 14122-30.
- 539 15. Licitra BN, Millet JK, Regan AD et al. Mutation in spike protein cleavage site  
540 and pathogenesis of feline coronavirus. *Emerg Infect Dis* 2013; **19**: 1066-73.
- 541 16. Vennema H, Poland A, Foley J et al. Feline infectious peritonitis viruses arise  
542 by mutation from endemic feline enteric coronaviruses. *Virology* 1998; **243**: 150-7.
- 543 17. Kipar A, Meli ML, Baptiste KE et al. Sites of feline coronavirus persistence in  
544 healthy cats. *The Journal of general virology* 2010; **91**: 1698-707.
- 545 18. Li P, Wang Y, Lavrijsen M et al. SARS-CoV-2 Omicron variant is highly  
546 sensitive to molnupiravir, nirmatrelvir, and the combination. *Cell Res* 2022; **32**: 322-4.

- 547 19. Gidari A, Sabbatini S, Schiaroli E et al. The Combination of Molnupiravir with  
548 Nirmatrelvir or GC376 Has a Synergic Role in the Inhibition of SARS-CoV-2  
549 Replication In Vitro. *Microorganisms* 2022; **10**.
- 550 20. Hiscox JA, Khoo SH, Stewart JP et al. Shutting the gate before the horse has  
551 bolted: is it time for a conversation about SARS-CoV-2 and antiviral drug resistance?  
552 *J Antimicrob Chemother* 2021; **76**: 2230-3.
- 553 21. Szemiel AM, Merits A, Orton RJ et al. In vitro selection of Remdesivir resistance  
554 suggests evolutionary predictability of SARS-CoV-2. *PLoS Pathog* 2021; **17**:  
555 e1009929.
- 556 22. Donovan-Banfield Ia, Penrice-Randal R, Goldswain H et al. Characterisation of  
557 SARS-CoV-2 genomic variation in response to molnupiravir treatment in the AGILE  
558 Phase IIa clinical trial. *Nature Communications* 2022; **13**: 7284-.
- 559 23. Sanderson T, Hisner R, Donovan-Banfield Ia et al. A molnupiravir-associated  
560 mutational signature in global SARS-CoV-2 genomes. *Nature* 2023; **623**: 594-600.
- 561 24. Li P, de Vries AC, Kamar N et al. Monitoring and managing SARS-CoV-2  
562 evolution in immunocompromised populations. *Lancet Microbe* 2022; **3**: e325-e6.
- 563 25. Bentley EG, Kirby A, Sharma P et al. SARS-CoV-2 Omicron-B.1.1.529 Variant  
564 leads to less severe disease than Pango B and Delta variants strains in a mouse  
565 model of severe COVID-19. *bioRxiv* 2021: 2021.12.26.474085.
- 566 26. Clark JJ, Penrice-Randal R, Sharma P et al. Sequential infection with influenza  
567 A virus followed by severe acute respiratory syndrome coronavirus 2 (SARS-CoV-2)  
568 leads to more severe disease and encephalitis in a mouse model of COVID-19.  
569 *bioRxiv* 2023: 2020.10.13.334532.
- 570 27. Gaynor KU, Vaysburd M, Harman MAJ et al. Multivalent bicyclic peptides are  
571 an effective antiviral modality that can potently inhibit SARS-CoV-2. *Nature*  
572 *Communications* 2023; **14**: 3583.
- 573 28. Russell CD, Valanciute A, Gachanja NN et al. Tissue Proteomic Analysis  
574 Identifies Mechanisms and Stages of Immunopathology in Fatal COVID-19. *Am J*  
575 *Respir Cell Mol Biol* 2021.
- 576 29. Dorward DA, Russell CD, Um IH et al. Tissue-Specific Immunopathology in  
577 Fatal COVID-19. *Am J Respir Crit Care Med* 2021; **203**: 192-201.
- 578 30. Patterson EI, Prince T, Anderson ER et al. Methods of Inactivation of SARS-  
579 CoV-2 for Downstream Biological Assays. *J Infect Dis* 2020; **222**: 1462-7.
- 580 31. Davidson AD, Williamson MK, Lewis S et al. Characterisation of the  
581 transcriptome and proteome of SARS-CoV-2 reveals a cell passage induced in-frame  
582 deletion of the furin-like cleavage site from the spike glycoprotein. *Genome Med* 2020;  
583 **12**: 68.
- 584 32. De Neck S, Penrice-Randal R, Clark JJ et al. The Stereotypic Response of the  
585 Pulmonary Vasculature to Respiratory Viral Infections: Findings in Mouse Models of  
586 SARS-CoV-2, Influenza A and Gammaherpesvirus Infections. *Viruses* 2023; **15**(8)  
587 (Access Date Access 2023, date last accessed).
- 588 33. Seehusen F, Clark JJ, Sharma P et al. Neuroinvasion and Neurotropism by  
589 SARS-CoV-2 Variants in the K18-hACE2 Mouse. *Viruses* 2022; **14**.
- 590 34. Coolen JPM, Wolters F, Tostmann A et al. SARS-CoV-2 whole-genome  
591 sequencing using reverse complement PCR: For easy, fast and accurate outbreak  
592 and variant analysis. *Journal of Clinical Virology* 2021; **144**: 104993.
- 593 35. Avanzato VA, Matson MJ, Seifert SN et al. Case Study: Prolonged Infectious  
594 SARS-CoV-2 Shedding from an Asymptomatic Immunocompromised Individual with  
595 Cancer. *Cell* 2020; **183**: 1901-12.e9.

- 596 36. Burki T. The origin of SARS-CoV-2 variants of concern. *Lancet Infect Dis* 2022;  
597 **22**: 174-5.
- 598 37. Caccuri F, Messali S, Bortolotti D et al. Competition for dominance within  
599 replicating quasispecies during prolonged SARS-CoV-2 infection in an  
600 immunocompromised host. *Virus Evol* 2022; **8**: veac042.
- 601 38. Chen L, Zody MC, Di Germanio C et al. Emergence of Multiple SARS-CoV-2  
602 Antibody Escape Variants in an Immunocompromised Host Undergoing Convalescent  
603 Plasma Treatment. *mSphere* 2021; **6**: e0048021.
- 604 39. Choi B, Choudhary MC, Regan J et al. Persistence and Evolution of SARS-  
605 CoV-2 in an Immunocompromised Host. *New England Journal of Medicine* 2020; **383**:  
606 2291-3.
- 607 40. Peng KW, Myers R, Greenslade A et al. Using clinically approved  
608 cyclophosphamide regimens to control the humoral immune response to oncolytic  
609 viruses. *Gene Therapy* 2013; **20**: 255-61.
- 610 41. Schaecher SR, Stabenow J, Oberle C et al. An immunosuppressed Syrian  
611 golden hamster model for SARS-CoV infection. *Virology* 2008; **380**: 312-21.
- 612 42. Ramasamy S, Kolloli A, Kumar R et al. Comprehensive Analysis of Disease  
613 Pathology in Immunocompetent and Immunocompromised Hosts following Pulmonary  
614 SARS-CoV-2 Infection. *Biomedicines* 2022; **10**: 1343.
- 615 43. Brocato RL, Principe LM, Kim RK et al. Disruption of Adaptive Immunity  
616 Enhances Disease in SARS-CoV-2-Infected Syrian Hamsters. *J Virol* 2020; **94**.
- 617 44. Salzer R, Clark JJ, Vaysburd M et al. Single-dose immunisation with a  
618 multimerised SARS-CoV-2 receptor binding domain (RBD) induces an enhanced and  
619 protective response in mice. *FEBS Lett* 2021; **595**: 2323-40.
- 620 45. Legebeke J, Lord J, Penrice-Randal R et al. Evaluating the Immune Response  
621 in Treatment-Naive Hospitalised Patients With Influenza and COVID-19. *Front*  
622 *Immunol* 2022; **13**: 853265.
- 623 46. Escalera A, Gonzalez-Reiche AS, Aslam S et al. Mutations in SARS-CoV-2  
624 variants of concern link to increased spike cleavage and virus transmission. *Cell Host*  
625 *Microbe* 2022; **30**: 373-87.e7.
- 626 47. Braun KM, Moreno GK, Halfmann PJ et al. Transmission of SARS-CoV-2 in  
627 domestic cats imposes a narrow bottleneck. *PLOS Pathogens* 2021; **17**: e1009373.
- 628 48. Mizuki Y, Keiko T, Youko H et al. SARS-CoV-2 Omicron spike H655Y mutation  
629 is responsible for enhancement of the endosomal entry pathway and reduction of cell  
630 surface entry pathways. *bioRxiv* 2022: 2022.03.21.485084.
- 631 49. Ou J, Lan W, Wu X et al. Tracking SARS-CoV-2 Omicron diverse spike gene  
632 mutations identifies multiple inter-variant recombination events. *Signal Transduction*  
633 *and Targeted Therapy* 2022; **7**: 138.
